## Endothelial-like malignant glioma cells in dynamic three dimensional culture identifies a role for VEGF and FGFR in a tumor-derived angiogenic response

### Supplementary Material

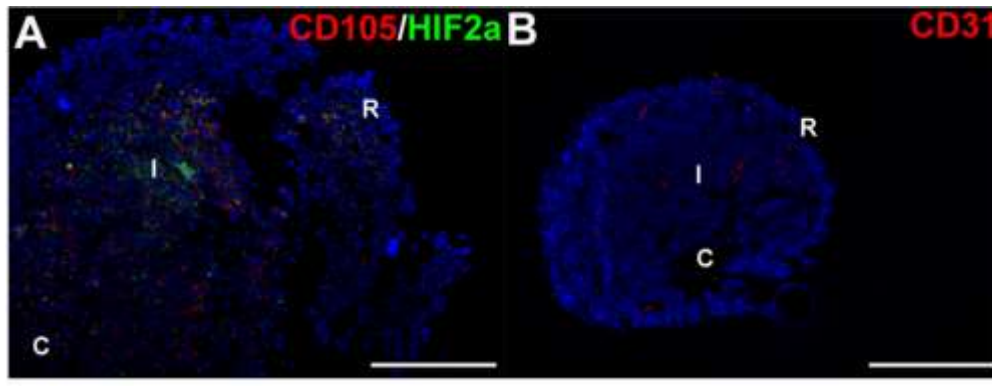

**Supplementary Figure 1: Whole-field RCCS U87 aggregate views of CD105 and CD31 positive cells.** (A) Location of CD105 positive cells in relation to aggregate location and to HIF-2 $\alpha$  positive cells. (B) Location of CD31 positive cells in relation to aggregate location. Aggregate core, rim and interface regions are denoted as *C*, *R* and *I* respectively. *Scale bar* = 200 $\mu$ m.

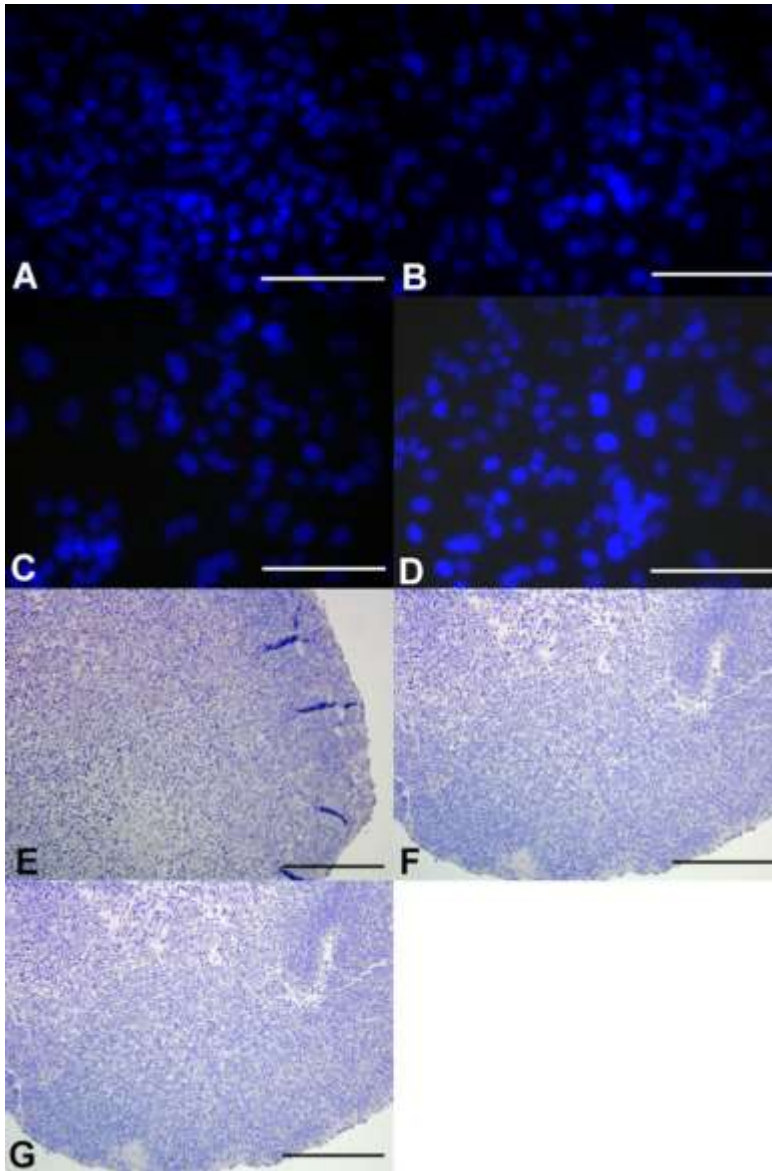

**Supplementary Figure 2: Negative staining for CD105 and CD31 in monolayers and stem cell aggregates (CD31).** (A) Merged image with no positive (red) staining for CD105 on immunofluorescence (IF) of a KNS42 2D monolayer. (B) Merged image with no positive CD105 staining (red) on IF of a U87 2D monolayer. (C) Merged image with no positive CD31 staining (red) on IF of a KNS42 2D monolayer. (D) Merged image with no positive CD31 staining (red) on IF of a U87 2D monolayer. In A-D monolayer cells were cultured for 72 hours prior to staining with either endothelial marker. (E-G) Immunohistochemistry against CD31 on aggregates of ESC (E), NSC (F) and NSC with OCT4 overexpression (G) with no discernible positive staining. *Scale bar A-D = 25 $\mu$ m E-G = 200 $\mu$ m.*

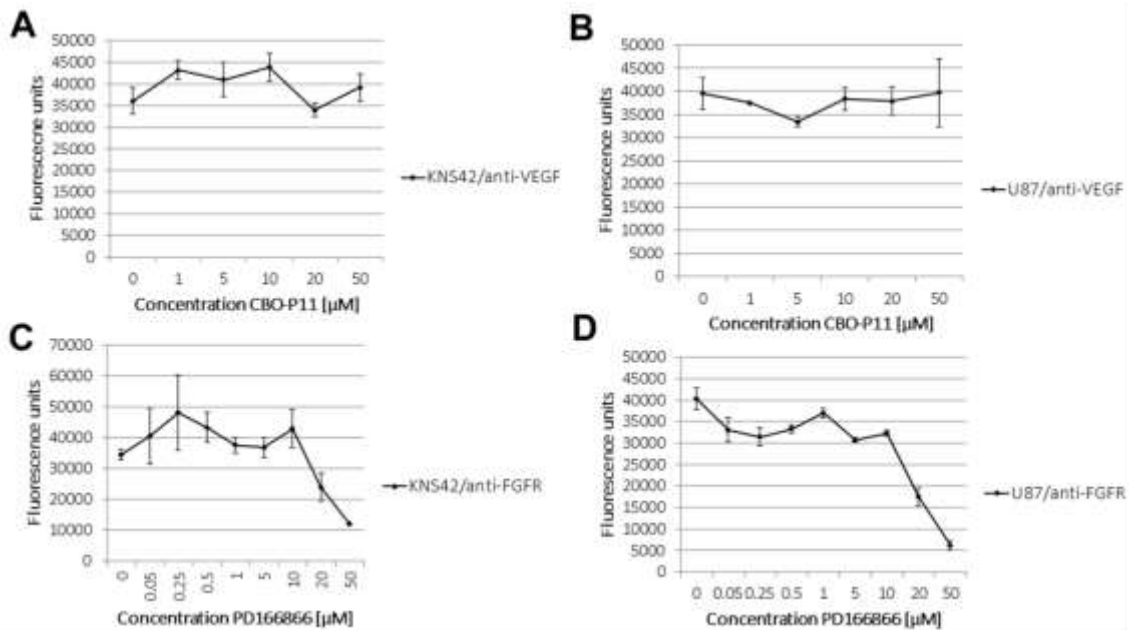

**Supplementary Figure 3: KNS42 and U87 RCCS aggregate viability upon exposure to either VEGF inhibitor (CBO-P11) or FGFR inhibitor (PD166866).** (A-B) Exposure of either glioma aggregate to up to 50  $\mu\text{M}$  VEGF inhibitor resulted in no impairment of cell viability. (C-D) Exposure of either glioma aggregate to FGFR inhibitor, resulted in marked loss of cell viability at concentrations above 10  $\mu\text{M}$ . Based on this data, 15  $\mu\text{M}$  and 10  $\mu\text{M}$  were chosen as VEGF inhibitor and FGFR inhibitor concentrations respectively, by which to monitor anti-angiogenic response without dramatically impairing cell viability.

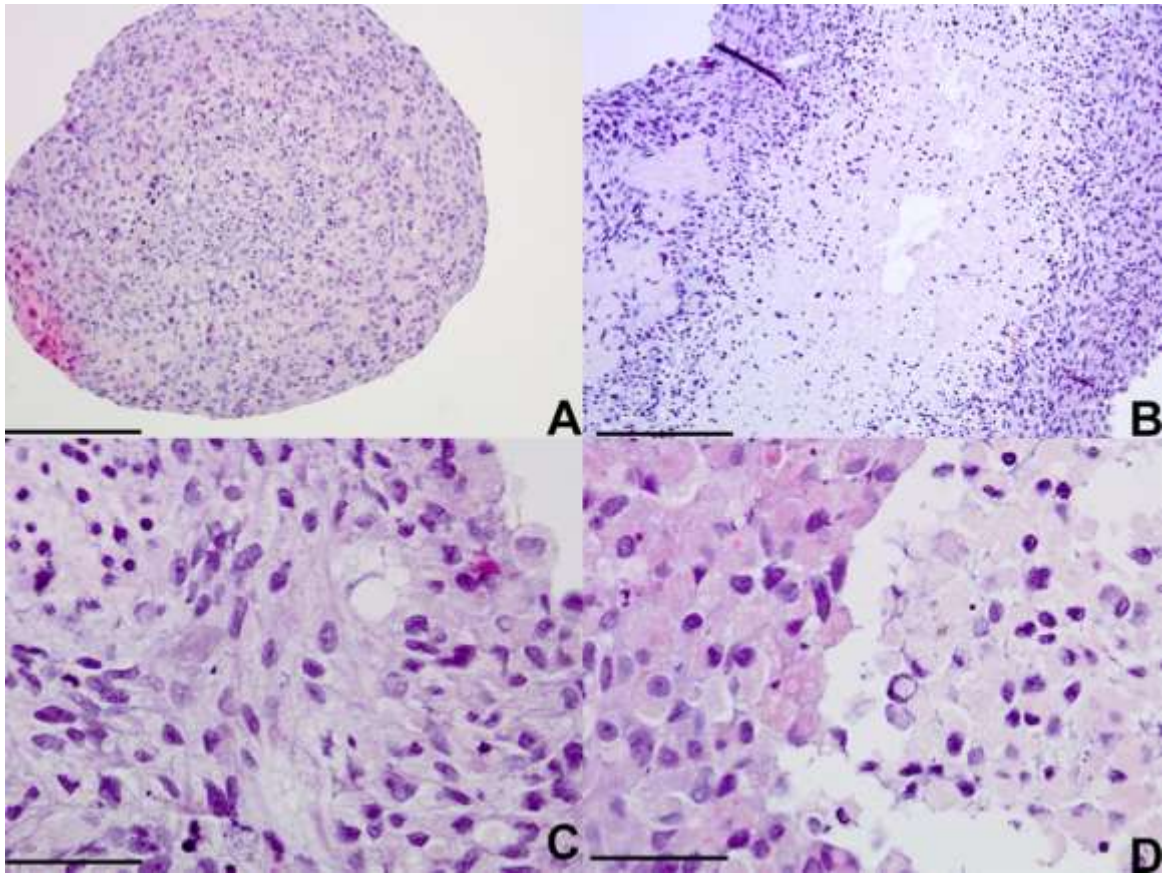

**Supplementary Figure 4: Hematoxylin and eosin stained sections of anti-angiogenic drug treated aggregates.** (A) KNS42 aggregate treated with 15 $\mu$ M PD166866 (FGFR inhibition) (B) KNS42 aggregate treated with 10 $\mu$ M CBO-P11 (VEGF inhibition) (C) U87 aggregate, FGFR inhibition (D) U87 aggregate, VEGF inhibition. *Scale bar A&B = 200 $\mu$ m C&D = 25 $\mu$ m.*

**Supplementary Table 1:** Genes significantly differentially expressed between 3D and 2D KNS42 GBM cultures.

**Supplementary Table 2:** Genes significantly differentially expressed between 3D and 2D U87 GBM cultures.

**Supplementary Table 3:** Full list of genes differentially expressed between a GBM primary tumor explant T7 / 11 cultured in the RCCS for 3 weeks and a monolayer culture derived from the T7 / 11 explant and cultured for six passages.

**Supplementary Table 4:** Genes significantly differentially expressed between HBMEC / KNS42 RCCS co-culture and KNS42 RCCS culture.

**Supplementary Table 5:** Genes significantly downregulated in KNS42 aggregates in response to VEGF inhibition with the VEGF inhibitor CBO-P11 relative to untreated aggregates.

**Supplementary Table 6:** Genes significantly downregulated in KNS42 aggregates in response to FGF inhibition with the FGF receptor tyrosine kinase inhibitor PD166866 relative to untreated aggregates.

**Supplementary Table 7:** Genes significantly differentially expressed between U87 aggregates treated with the VEGF inhibitor CBO-P11 and untreated aggregates.

**Supplementary Table 8:** Genes significantly differentially expressed between U87 aggregates treated with the FGFR inhibitor PD166866 and untreated aggregates.

For Tables S1 to S8, please see the attached Excel file.
